# Supplementary material for: Evaluation of Environmentally Relevant Nitrated and Oxygenated Polycyclic Aromatic Hydrocarbons in Honey
Source: MDPI journal article supplement (doi:10.3390/foods12112205), 2023-05-31
Supplement: s1 [file s1]

## Supplementary Material

### **Evaluation of environmentally relevant nitrated and oxygenated polycyclic aromatic hydrocarbons in honey**

Alejandro Mandelli <sup>a,b</sup>, María Guíñez <sup>a,b\*</sup>, Soledad Cerutti <sup>a,b\*</sup>

<sup>a</sup> *Instituto de Química de San Luis (INQUISAL, UNSL-CONICET CCT-San Luis), Área de Química Analítica, Facultad de Química Bioquímica y Farmacia, Universidad Nacional de San Luis, Laboratorio de Espectrometría de Masas, Bloque III, Ejército de los Andes 950, San Luis, CP 5700, Argentina.*

<sup>b</sup> *Consejo Nacional de Investigaciones Científicas y Técnicas (CONICET), Godoy Cruz 2290, C1425FQB Buenos Aires, Argentina.*

\*Corresponding authors: Tel: +54 0266 4520300\*1311.

**Table S1.** Structures of environmentally relevant nitrated and oxygenated polycyclic aromatic hydrocarbons.

| Compound                | Empirical formula                              | Structure                                                                           | Abbreviation  | Molecular Weight<br>(g mol <sup>-1</sup> ) |
|-------------------------|------------------------------------------------|-------------------------------------------------------------------------------------|---------------|--------------------------------------------|
| 1-Nitropyrene           | C <sub>16</sub> H <sub>9</sub> NO <sub>2</sub> | 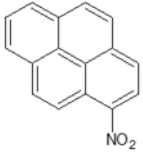   | 1-NPYR        | 247.25                                     |
| 2-Nitrofluorene         | C <sub>13</sub> H <sub>9</sub> NO <sub>2</sub> |    | 2-NFLU        | 211.22                                     |
| 3-Nitrofluoranthene     | C <sub>16</sub> H <sub>9</sub> NO <sub>2</sub> |    | 3-NFLUANT     | 247.25                                     |
| 9-Nitroanthracene       | C <sub>14</sub> H <sub>9</sub> NO <sub>2</sub> |   | 9-NANTHR      | 223.23                                     |
| 5,12-Naphthacenequinone | C <sub>18</sub> H <sub>10</sub> O <sub>2</sub> |  | 5,12-NAPHTONA | 258.27                                     |
| 9,10-Anthracenequinone  | C <sub>14</sub> H <sub>8</sub> O <sub>2</sub>  |  | 9,10-ANTHRONA | 208.21                                     |
| 2-Fluorencarboxaldehyde | C <sub>14</sub> H <sub>10</sub> O              |  | 2-FLUCHO      | 194.23                                     |

**Table S2.** Optimized MRM scanning mode mass spectrometer conditions for NPAH and OPAH.

| Compound      | Cone (V) | Precursor Ion (m/z) | Collision (V) | Product Ion (m/z) |
|---------------|----------|---------------------|---------------|-------------------|
| <i>NPAH</i>   |          |                     |               |                   |
| 1-NPYR        | 30       | 248                 | 16            | 218               |
|               |          |                     | 25            | 202*              |
|               |          |                     | 30            | 190               |
| 2-NFLU        | 30       | 212                 | 12            | 195               |
|               |          |                     | 17            | 165*              |
|               |          |                     | 17            | 231*              |
| 3-NFLUANTH    | 19       | 248                 | 16            | 218               |
|               |          |                     | 20            | 190               |
|               |          |                     | 8             | 207               |
| 9-NANTHR      | 19       | 224                 | 30            | 178*              |
|               |          |                     |               |                   |
| <i>OPAH</i>   |          |                     |               |                   |
| 5,12-NAPHTONA | 10       | 259                 | 35            | 242               |
|               |          |                     | 21            | 231               |
|               |          |                     | 23            | 203*              |
| 9,10-ANTHRONA | 35       | 209                 | 20            | 181               |
|               |          |                     | 20            | 153*              |
| 2-FLUCHO      | 32       | 195                 | 16            | 167*              |

\* Transition selected for quantification

**Table S3.** Variables and levels used in the 2<sup>4</sup> Full Factorial Design.

| Factor | Variable                                 | Levels |    |    |
|--------|------------------------------------------|--------|----|----|
|        |                                          | -1     | 0  | +1 |
| A      | Acetonitrile volume (mL)                 | 1      | 5  | 9  |
| B      | Water volume (mL)                        | 5      | 10 | 15 |
| C      | NaCl concentration (% w/v)               | 20     | 35 | 50 |
| D      | Ultrasound-assisted agitation time (min) | 0      | 15 | 30 |

**Table S4.** Variables and levels used in the Central Composite Design.

| Factor | Variable                 | Levels |    |    |
|--------|--------------------------|--------|----|----|
|        |                          | -1     | 0  | +1 |
| A      | Acetonitrile volume (mL) | 5      | 10 | 15 |
| B      | Water volume (mL)        | 10     | 20 | 30 |

**Table S5.** Penalty Points (PPs) considering the Analytical Eco-Scale.

| Category          | Sub-total PPs                             | Total PPs |
|-------------------|-------------------------------------------|-----------|
| <b>Reagents</b>   |                                           |           |
| <b>Amount</b>     | <10 mL (<10 g)                            | 1         |
|                   | 10-100 mL (10-100 g)                      | 2         |
|                   | >100 mL (>100 g)                          | 3         |
| <b>Hazards</b>    | Nonexistent                               | 0         |
|                   | Mild                                      | 1         |
|                   | High                                      | 2         |
| <b>Instrument</b> |                                           |           |
| <b>Energy</b>     | <0.1 kWh per sample                       | 0         |
|                   | <1.5 kWh per sample                       | 1         |
|                   | >1.5 kWh per sample                       | 2         |
| <b>Risk</b>       | No emission of vapors into the atmosphere | 0         |
|                   | Emission of vapors into the atmosphere    | 3         |
| <b>Waste</b>      | Nonexistent                               | 0         |
|                   | <1 mL (<1 g)                              | 1         |
|                   | 1-10 mL (1-10 g)                          | 3         |
|                   | >10 mL (>10 g)                            | 5         |
|                   | Recycled                                  | 0         |
|                   | Degradation                               | 1         |
|                   | Inactivate                                | 2         |
|                   | No treatment                              | 3         |

**Table S6.** ANOVA chart of statistical effects.

| <i>Compound</i>      | <i>Response Transformation</i> | <i>Modeling</i> | <i>p<sup>a</sup>-value</i> |                           | <i>R<sup>2</sup><sub>adj.</sub></i> | <i>CV (%)</i> |
|----------------------|--------------------------------|-----------------|----------------------------|---------------------------|-------------------------------------|---------------|
|                      |                                |                 | <i>Modeling</i>            | <i>Lack of adjustment</i> |                                     |               |
| <b>1-NPYR</b>        | Natural Logarithm              | Quadratic       | 0.0062                     | 0.9045                    | 0.9073                              | 1.7           |
| <b>2-NFLU</b>        | Base 10 Logarithm              | Linear          | 0.0068                     | 0.9140                    | 0.9585                              | 1.8           |
| <b>3-NFLUANTH</b>    | Natural Logarithm              | Quadratic       | < 0.0001                   | 0.9484                    | 0.9935                              | 0.4           |
| <b>9-NANTHR</b>      | Natural Logarithm              | Linear          | < 0.0001                   | 0.0818                    | 0.9493                              | 1.5           |
| <b>5.12-NAPHTONE</b> | Natural Logarithm              | Quadratic       | < 0.0001                   | 0.9022                    | 0.9805                              | 0.6           |
| <b>9.10-ANTHRONE</b> | Natural Logarithm              | Quadratic       | < 0.0001                   | 0.8949                    | 0.9905                              | 0.5           |
| <b>2-FLUCHO</b>      | Natural Logarithm              | Quadratic       | < 0.0001                   | 0.8523                    | 0.9801                              | 0.6           |

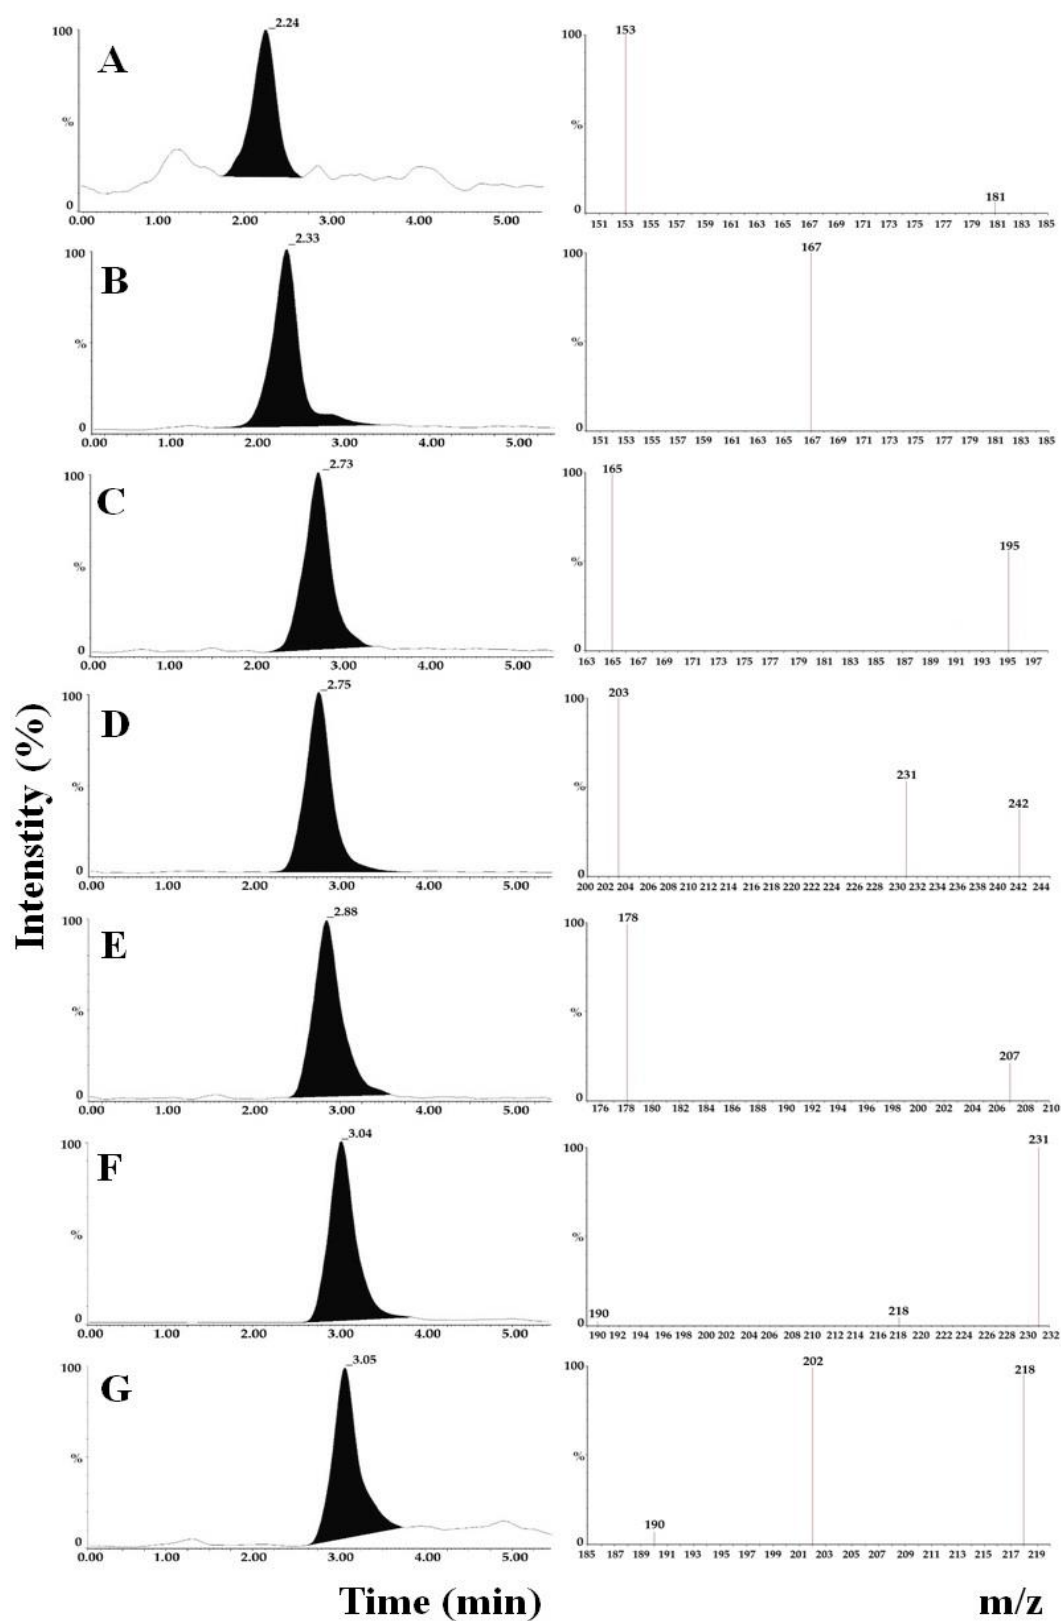

**Figure S1.** Chromatograms and mass spectra of products ions for NPAH and OPAH compounds for UHPLC- (+)APCI-MS/MS optimal conditions, (A) 9,10-ANTHRONA (Retention time, Rt: 2.24 min); (B) 2-FLUCHO (Rt: 2.36 min); (C) 2-NFLU (Rt: 2.73 min); (D) 5,12-NAPHTONE (Rt: 2.75 min); (E) 9-NANTHR (Rt: 2.88 min); (F) 3-NFLUANTH (Rt: 3.04 min), and (G) 1-NPYR (Rt: 3.05 min).



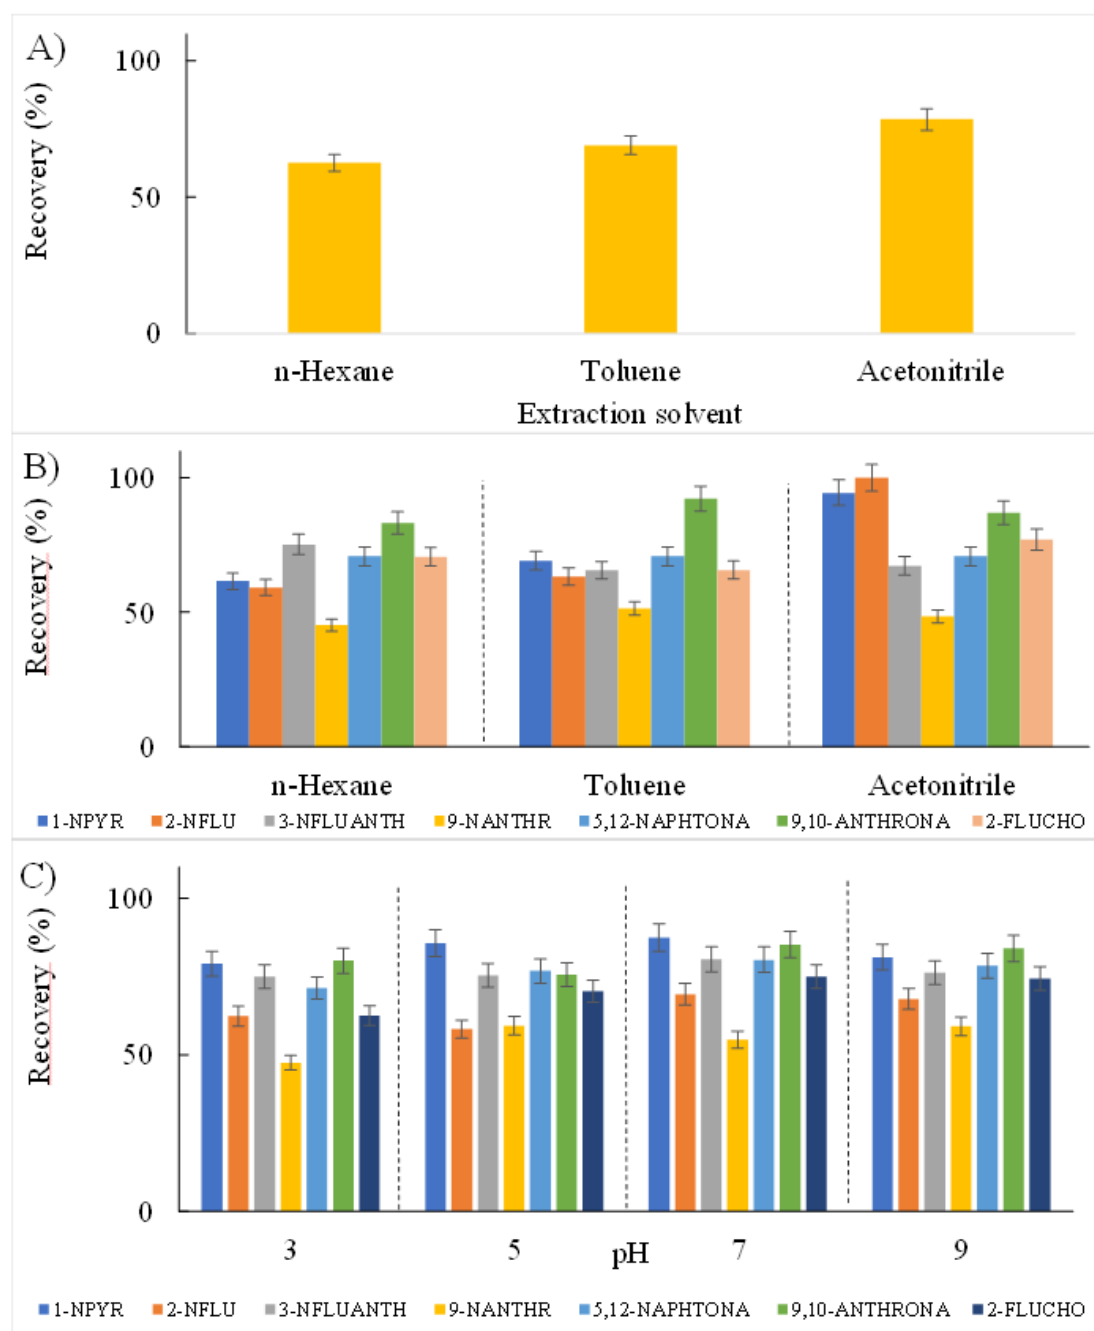

**Figure S2.** Optimization of the nature of the solvent (A), ionic strength effects (B), and pH (C) for the SALLE procedure.

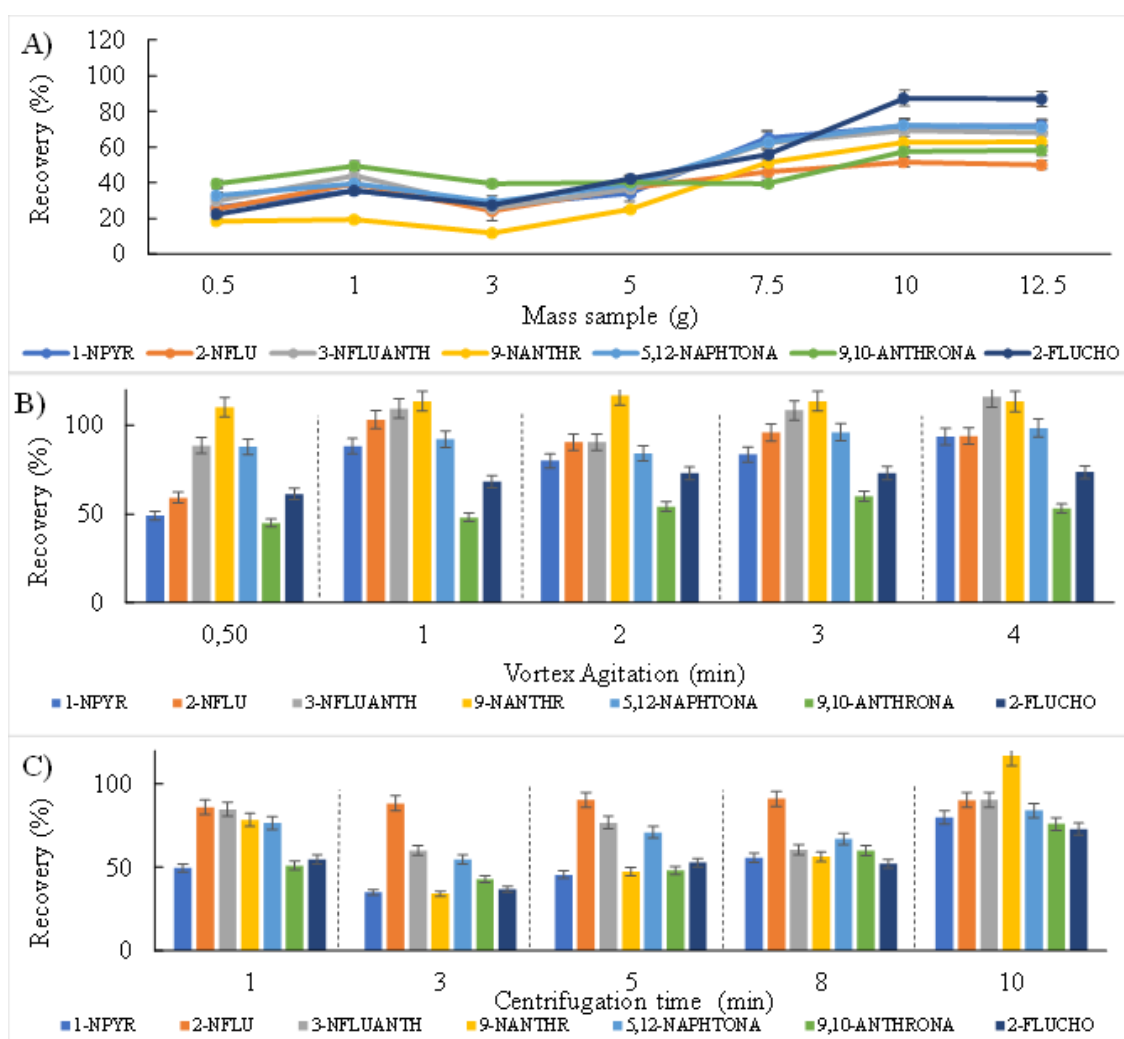

**Figure S3.** Optimization of vortex agitation (A), centrifugation time (B), and mass sample (C) for the SALLE procedure.

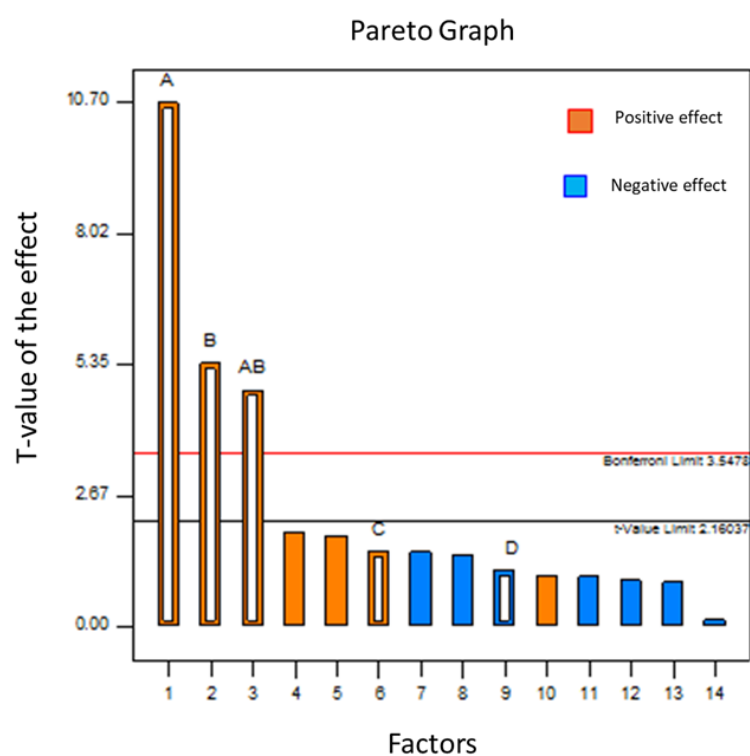

**Figure S4.** Pareto Chart of the main effects in the SALLE procedure for the simultaneous extraction of NPAHs and OPAHs. A: Volume of water. B: Volume of acetonitrile. AB: interaction between water and acetonitrile. C: NaCl concentration. D: Ultrasound extraction time

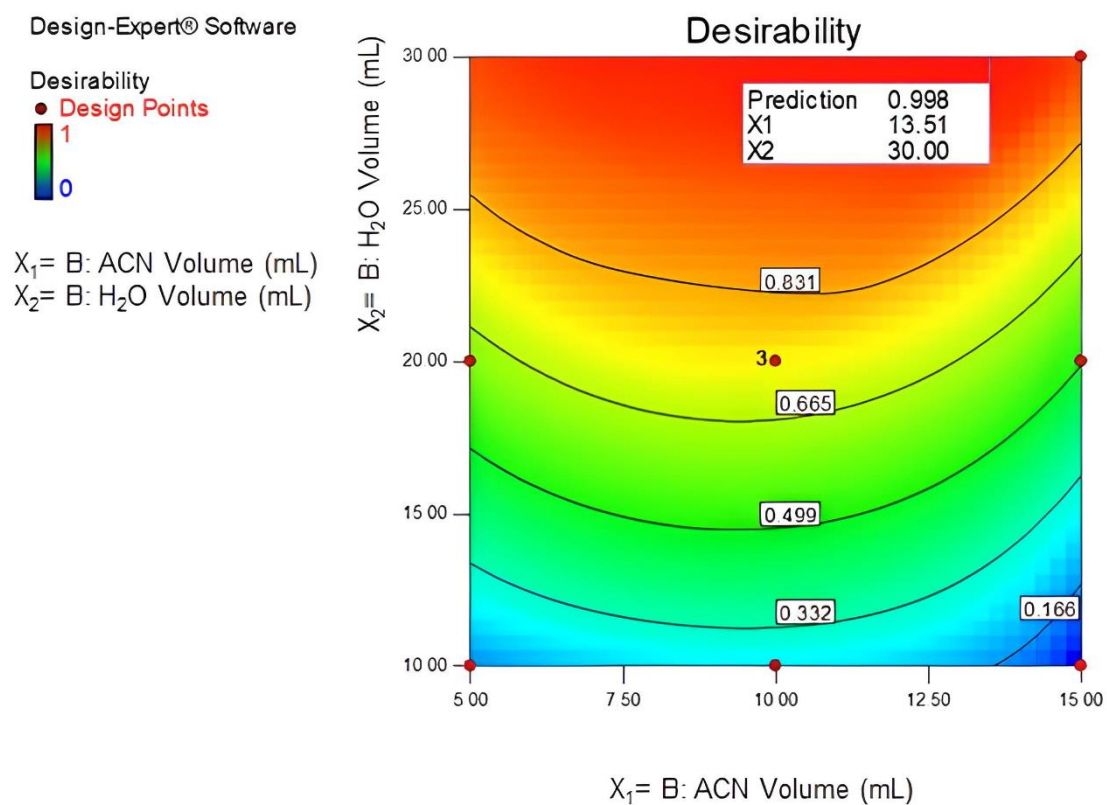

**Figure S5.** Representation of the desirability function for the optimized variables.
